# Supplementary material for: Interplay between a Wnt-dependent organiser and the Notch segmentation clock regulates posterior development in Periplaneta americana
Source: PubMed Central journal article supplement — Biol Open. 2012 Dec 19;2(2):227–37. doi: 10.1242/bio.20123699 (PMC3575657; doi:10.1242/bio.20123699), 2012-12-19
Supplement: supp_bio.20123699_bio.20123699-s1.pdf [file supp_bio.20123699_bio.20123699-s1.pdf]

A. *Periplaneta americana* Wnt1

|      |                                                    |      |
|------|----------------------------------------------------|------|
| 1    | GAAGGCCATTGAAATTTGTTAGAAAATGACTGTAATGTTAGAATGCTG   | 50   |
| 51   | CGACTAACATCTTCAATATTTTCCGTTGGAGTGTGTTTAAAGTAGA     | 100  |
| 101  | TTTTATGTAACAATACTACATTACGTTGGGTATATTTACTTTACCCT    | 150  |
| 151  | ATAATTTATGTTGAAGTGAATTTGTACAAGAAATGGAACAATGTAACGT  | 200  |
| 201  | ACAATTTAAGTGATAAAAATAAACAATGAAACAACGACTTAAGGGAA    | 250  |
| 251  | AATATTGTAAGTGAATTAAGTAAAGAGAAAATAAATATTTTGGTCAG    | 300  |
| 301  | CGATAGCTACGAATGTGAAATAACAACTAAAAGTCAGAAATCCGA      | 350  |
| 351  | CGCATCAAAATATATCAAGAAATCTAACRAGAAGAGAAATCAAGGGCAAT | 400  |
| 401  | CAATGAGAGACAATTTGCTGACTAGAATAACAACAATAGGCCATATA    | 450  |
| 451  | GAATGTGAAGATGACGATTACAGGAAATGTGAACAATTTAAGAAAAAT   | 500  |
| 501  | GTTCTAAAATAACAAGCGTAAGTCTTATCACTTACGAATAAAAATAGA   | 550  |
| 551  | AATAAAAACAGACATCGTTGACTGTCACATCGACATCGAATATTCGAGG  | 600  |
| 601  | AAGACTTCAGAATACTGGTTGATAATACTATCCGAAGATCGCTGAGGAT  | 650  |
| 651  | TAGCACAAAACAGACTTCCGGTACAAAACATAATGCAAGATATGTTGC   | 700  |
| 1    | M Q D I V                                          | 5    |
| 701  | GCTCAGGAATACCTGTGTGTTGTTCCAGGGGATGCGAAAGCCGGCGAG   | 750  |
| 6    | R S G I P V C L F Q G I A K A G E                  | 22   |
| 751  | CCCAACAACCTTGTTCGCGAGACCGCGGGCGCGCTCTACATGACCCGCG  | 800  |
| 23   | P N N L L P Q T P G A L Y M D P A                  | 39   |
| 801  | CGTCCAGCCATTCGCGGGGAGCAGAGACGCTAGTTCCGGGAAACC      | 850  |
| 40   | V H A I L R R K Q R R L V R E N                    | 55   |
| 851  | CGGGAGTTCTTGGCGGTAGCAAAGGTGCTAACAGGCCATCGTGGA      | 900  |
| 56   | P G V L V A V A K G A N Q A I V E                  | 72   |
| 901  | TGCCAGTTCCAGTTTCAAAACAGGAGGTGGAACCTGCTCGACAAGAAAT  | 950  |
| 73   | C Q F Q F R N R R W N C S T R N F                  | 89   |
| 951  | TCTACAGGCAAAAACCTCTTCGGAATAATGTTGACAGAGTTGTCGGG    | 1000 |
| 90   | L R G K N L F G K I V D R G C R                    | 105  |
| 1001 | AGACGGGTTTCATATACGCATCAAAAGTGGCGGCTGACACAGCGTATC   | 1050 |
| 106  | E T A F I Y A I T S A G V T H A I                  | 122  |
| 1051 | CGCGGGCGCGCAGCGAGGCGAGCATCGAGTCTGCGACGTTGATTACAG   | 1100 |
| 123  | A R A R S E G S I E S C T C D Y S                  | 139  |
| 1101 | CCACCAGCGCGGGCGCGAGTGACCTCGTCCGCGCGGCTCCGGCAGT     | 1150 |
| 140  | H Q A R A P Q V T S V P G L R D                    | 155  |
| 1151 | GGGAGTGGGCGGCTGCTCCGACAACATCGGCTACGGTTCAAGTTCTCC   | 1200 |
| 156  | W E W G G C S D N I G Y G F K F S                  | 172  |
| 1201 | CGCGAATTCGTGATCCGCGCGGGGCGCAACCTCCGCGAGAGAT        | 1250 |
| 173  | R E F V D T G E R G R N L R E K M                  | 189  |
| 1251 | GAATCCACAACAATGAGCGCGCAGAGCGCAGCTTCTCCGGAGATGC     | 1300 |
| 190  | N L H N N E A G R A H V S S E M                    | 205  |
| 1301 | GTCAGAATGTAAGTGCACGGCATGTCTGGCTCCTGCAACGGTCAAGACC  | 1350 |
| 206  | R Q E C K C H G M S G S C T V K T                  | 222  |
| 1351 | TGCTGGATCGCGCTGCCAGCTTCCGAGTCTGATAGCGCACAACCTCAAG  | 1400 |
| 223  | C W M R L P S F R V V G D N L K D                  | 239  |
| 1401 | CCGCTTCGACGCGCGCTCAGAGTGTGGTGAATAACCGCGGCGCAGCTGC  | 1450 |
| 240  | R F D G A S R M V S N A G S L                      | 255  |
| 1451 | GGCGCAGGTTGGTACGGCGCGCGCGCTCGGTTGTAAGAAGAACA       | 1500 |
| 256  | R G Q G G S G S G V G G K K N R                    | 272  |
| 1501 | TACAACCTCAACTGAAACCTTACAACCGGACCAACGCGCGCGCGC      | 1550 |
| 273  | Y N F Q L K P Y N N P D H K P P G                  | 289  |
| 1551 | CAAAGACCTGGTCTACTTGAGCCCTCCCAAGGTTCTGCGAGCGCAACC   | 1600 |
| 290  | K D L V Y L E P S P G F C E R N                    | 305  |
| 1601 | CGAGACTCGGTATCAAGGACCGCAGCGCTCAGTCAACGATACGTTG     | 1650 |
| 306  | P R L G I Q G T H G R Q C N D T S                  | 322  |
| 1651 | ATAGCGGTGGATGTTCCGACCTCATGTGTTGGCGGAGGATATAGAAC    | 1700 |
| 323  | I G V D G C D L M C C G R G Y R T                  | 339  |
| 1701 | TCATGAGTGTCCGTTGTCAGAGTGTGCTGCTGATGTTCCACTGGTGT    | 1750 |
| 340  | H E V S V V Q R C A C M F H W C                    | 355  |
| 1751 | GGCAAGTCAAGTCAACCTCTGTCGGACAAGAAAACATTCACACGTTG    | 1800 |
| 356  | C E V K C N L C R T K K T I H T C                  | 372  |
| 1801 | CTGTGAGTGGTAAAAAGAAAACATTCACCCATCTGTGAGTGTGCGAA    | 1850 |
| 373  | L *                                                | 373  |
| 1851 | AGAAAACCATCCACAGTGTCTGTGAGTGGTGAAGAAAACAATTCACC    | 1900 |
| 1901 | CATACTAGTGTGCTGCAAGAAAACATCCACAGTGTCTGTGAGTGG      | 1950 |
| 1951 | TGAAAAGAAAACATTCACATTTGCTTGTGAGTGTGCAAGAAAACAT     | 2000 |
| 2001 | CCACACATATCTGATGATCAGCATAGTAAACTCGTTAATTTGCTGCGA   | 2050 |
| 2051 | GTGCTTCAAAATCATTACATATCGATAAGTATTTGGACAAGAGAAAAC   | 2100 |
| 2101 | ATCACACTGTTGTGATCGTTTCAAAATGAAACCATCCAGATGTTGTT    | 2150 |
| 2151 | GGTGGTGAAGAGTAACGTACACACTTGTATATGTTGACATGTAAGAGC   | 2200 |
| 2201 | GCTGGACAAGAGAACCCCAAAATGTTTACGTTGAGTACGTACTGCA     | 2250 |
| 2251 | CAAAACAATACATTCACACGCTTTATGAGCATACTGAGAGATACGTAT   | 2300 |
| 2301 | CTGTGGGTACGCAAAAATAAAGTCAACAACCGCTTTATGGTGTGTTAT   | 2350 |
| 2351 | GAAAAAATAAATA                                      | 2364 |

B. Alignment and phylogenetic analysis of *Pa*-Wnt1 protein

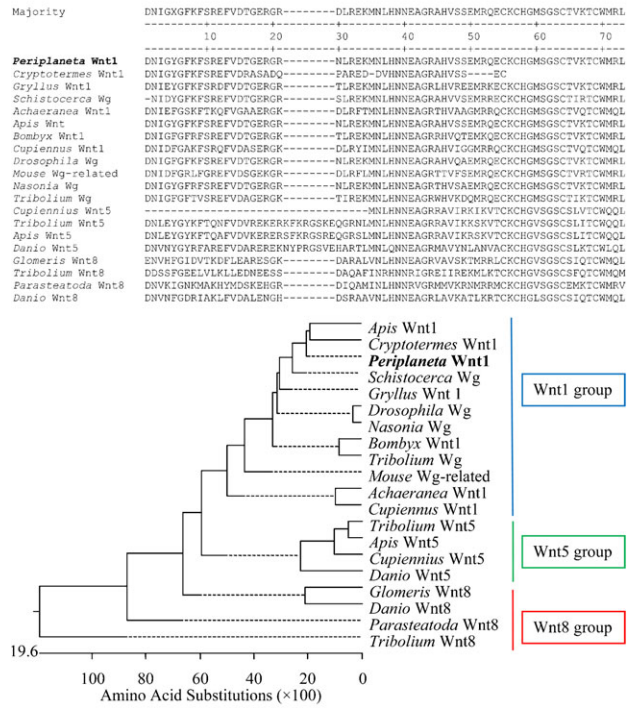

C. List of primer sequences used in degenerate PCR, 5'RACE and 3'RACE for *Pa*-Wnt1

- Pa*-Wnt1 degenerate forward 1 (outer): 5' CGNCCGVTGGAAGTGYTCNAC 3'
- Pa*-Wnt1 degenerate reverse 1 (outer): 5' RCAGCACCARTGRAABGTRCA 3'
- Pa*-Wnt1 degenerate forward 2 (inner): 5' TGGGGYGGHTGCTSBGAYAAAT 3'
- Pa*-Wnt1 degenerate reverse 2 (inner): 5' GCCNKKCCGSAGCACATVAG 3'
- Pa*-Wnt1 specific 5'RACE reverse 1 (outer): 5' TGAGATATCATCTTCTCCGGAGGT 3'
- Pa*-Wnt1 specific 5'RACE reverse 1 (inner): 5' CTTGTCGAGCAGTTCCACTCTCTG 3'
- Pa*-Wnt1 specific 5'RACE reverse 2 (outer): 5' GAATTCCGGGAGAACTTGAAGCC 3'
- Pa*-Wnt1 specific 5'RACE reverse 2 (inner): 5' AACTAGACGTTCTGCTTCCGCCG 3'
- Pa*-Wnt1 specific 3'RACE forward 1 (outer): 5' TTCTGCGAGCGCAACCCGAGA 3'
- Pa*-Wnt1 specific 3'RACE forward 1 (inner): 5'GTCAGTGCAACGATACGTCGATAGGCT 3'

Fig. S2. Nucleotide and protein sequences for *Periplaneta* Wnt1 and phylogenetic analysis. (A) The 2360 bp nucleotide sequence of *Periplaneta* Wnt1 codes for a 373 amino acid protein. (B) Phylogenetic analysis of a conserved 108 aa region of the *Pa*-Wnt1 protein sequence with other known sequences shows that *Pa*-Wnt1 is the *Periplaneta* orthologue and aligns with closely related insect species. (C) List of degenerate and specific primer sequences used to isolate and sequence the *Periplaneta* Wnt1.

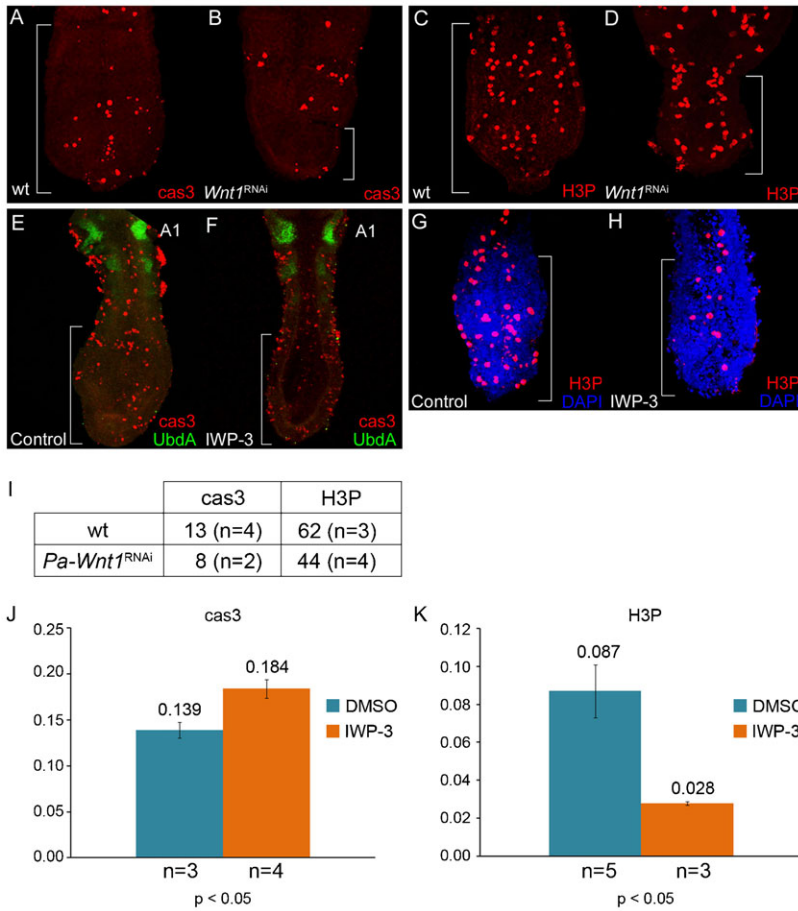

**Fig. S3. *Wnt1* regulates growth but not cell death in the growth zone.** In both wild type (A) and *Pa-Wnt1<sup>RNAi</sup>* (B) embryos, apoptosis (as detected by  $\alpha$ -cleaved caspase 3; cas3) is minimal and scattered throughout the GZ. (C) In wild type, numerous cells undergoing mitosis are seen (as detected by  $\alpha$ -phosphorylated Histone 3; H3P). (D) Cell proliferation is lower in the small GZ of *Pa-Wnt1<sup>RNAi</sup>* embryos. (E,F) The number of dying cells is increased in DMSO control (E) and IWP-3 (F) cultured embryos compared to A and B, yet similar to each other. This increase in cell death is likely due to the cytotoxic nature of DMSO and not to a role of Wnt signalling in apoptosis. Additionally, expression of the Hox genes *Ubx* and *AbdA* (as detected by mouse monoclonal antibody FP6.87;  $\alpha$ -UbdA), remain unaffected in DMSO control (E) and IWP-3 (F) treated culture embryos, indicating that IWP-3 only affects Wnt signalling and not other patterning genes. In culture, the number of mitotic cells is reduced in control embryos (G), compared to wild type (C), and are much lower in IWP-3 treated embryos (H). Staining with the vital dye DAPI showed similar amounts of living cells in control and IWP-3 treated embryos, indicating a healthy GZ. (I) Table representing the average number of cells counted undergoing apoptosis (cas3) or mitosis (H3P) in the various control and Wnt depleted backgrounds. Apoptotic index (J) and mitotic index (K) comparisons between DMSO control and IWP-3 cultured embryos. All embryos are stage 9 and the growth zone is marked with a bracket. A1: first abdominal segment.

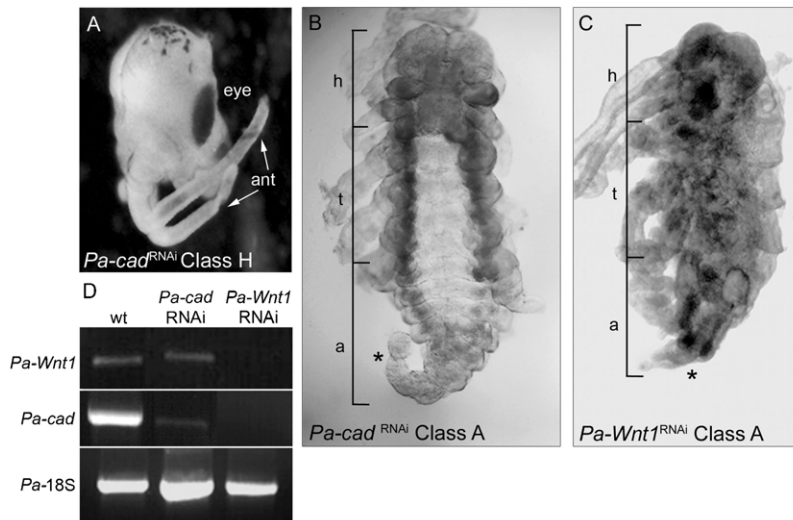

**Fig. S4. Quantification of *Pa-cad<sup>RNAi</sup>* and *Pa-Wnt1<sup>RNAi</sup>* phenotypes.** (A) Class ‘H’ *Pa-cad<sup>RNAi</sup>* embryo in which only the anterior-most head segments, eyes and antennae, develop properly. (B) In Class ‘A’ *Pa-cad<sup>RNAi</sup>* embryos the head and thorax develop properly, while the abdomen appears normal in the anterior, but tapers into a point at the posterior (\*). (C) Similarly, Class ‘A’ *Pa-Wnt1<sup>RNAi</sup>* phenotypes have a normally developed head and thorax with a truncated and tapered abdomen (\*). (D) RT-PCR analysis of stage 9 Class ‘T’ *Pa-cad<sup>RNAi</sup>* and *Pa-Wnt1<sup>RNAi</sup>* embryos. *Pa-Wnt1* expression remains at wild type levels in *Pa-cad<sup>RNAi</sup>* but is abolished in *Pa-Wnt1<sup>RNAi</sup>*. Only trace amounts of *Pa-cad* expression can be detected in *Pa-cad<sup>RNAi</sup>* and is absent in *Pa-Wnt1<sup>RNAi</sup>*. *Periplaneta* 18S ribosomal subunit was used as a positive control in each case. These data suggest that the different phenotypic RNAi classes correlate with the degree of hypomorphy (RNA loss) caused by the RNAi treatment on a single, continuous function required for posterior segment development throughout embryogenesis. In the case of *Pa-cad* if enough expression is present during germ band elongation, further segments will develop, if not, posterior segment development will be arrested and the animals will display only the head and some thoracic segments formed at blastoderm. Thus, Class ‘H’ *Pa-cad<sup>RNAi</sup>* embryos display a total or very strong loss of *Pa-cad* RNA whereas in Class ‘A’ *Pa-cad* can remain at near wild type levels (not shown). The same holds true for *Pa-cad* expression in *Pa-Wnt1<sup>RNAi</sup>* embryos. ant: antennae; h: head; t: thorax; a: abdomen.

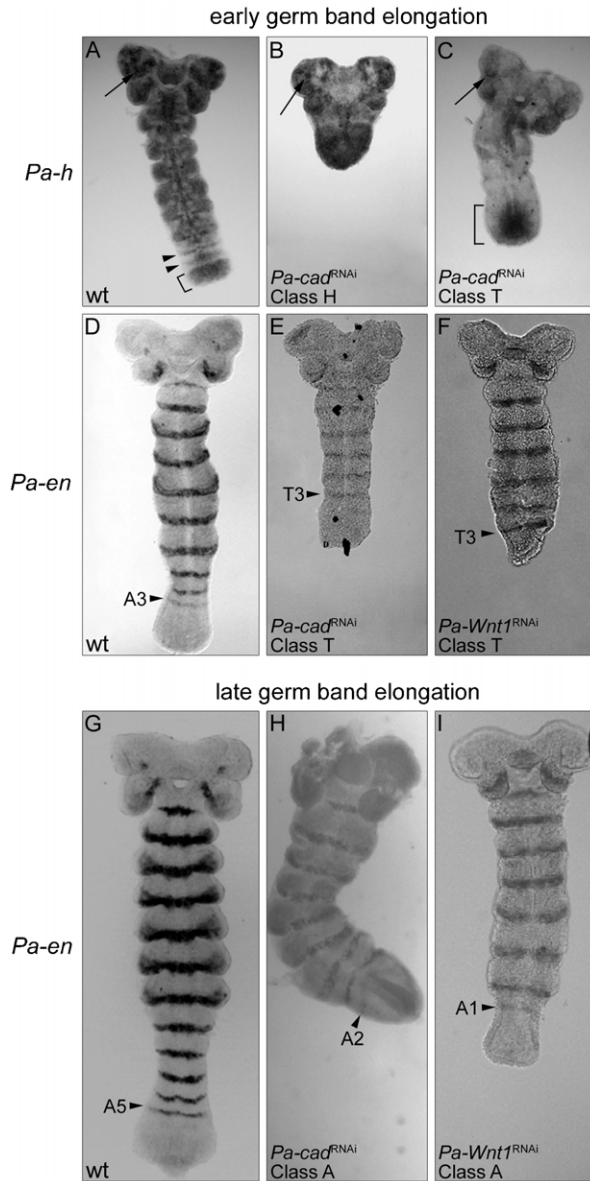

**Fig. S5. Expression of segmental markers in *Pa-cad*<sup>RNAi</sup> and *Pa-Wnt1*<sup>RNAi</sup> phenotypic classes.** (A) *Pa-hairy* (*Pa-h*) expression in wild type embryo (stage 7) showing a broad domain at the posterior GZ and in transient segmental stripes (A1 and A2) in the anterior GZ. Expression of *Pa-h* is also observed in the head, CNS midline and somites. (B) In a class ‘H’ *Pa-cad*<sup>RNAi</sup> embryo *Pa-h* expression is in the head and in an expanded domain at the posterior but no segmental stripes are observed. (C) Similarly, in class ‘T’ *Pa-cad*<sup>RNAi</sup> embryo, *Pa-h* segmental stripes are absent and *Pa-h* posterior GZ domain expanded. (D) Segmental expression of the *Pa-en* in a wild type embryo (stage 8) reaching the A3 segment. (E) *Pa-en* expression in a class ‘T’ *Pa-cad*<sup>RNAi</sup> embryo shows that segment formation proceeds until the thoracic segments. (F) Likewise, in a class ‘T’ *Pa-Wnt1*<sup>RNAi</sup> embryo *Pa-en* segmental stripes are observed up to T3 segment. (G) Expression pattern of *Pa-en* in a stage 9 wild type embryo showing expression up to the A5 segment. (H) Expression of *Pa-en* in a class ‘A’ *Pa-cad*<sup>RNAi</sup> embryo with a reduced GZ shows that only two abdominal segments have been formed. (I) Similarly, in a class ‘A’ *Pa-Wnt1*<sup>RNAi</sup> embryo the A1 *Pa-en* segmental stripe has been laid down. Note that the GZ is reduced in size.

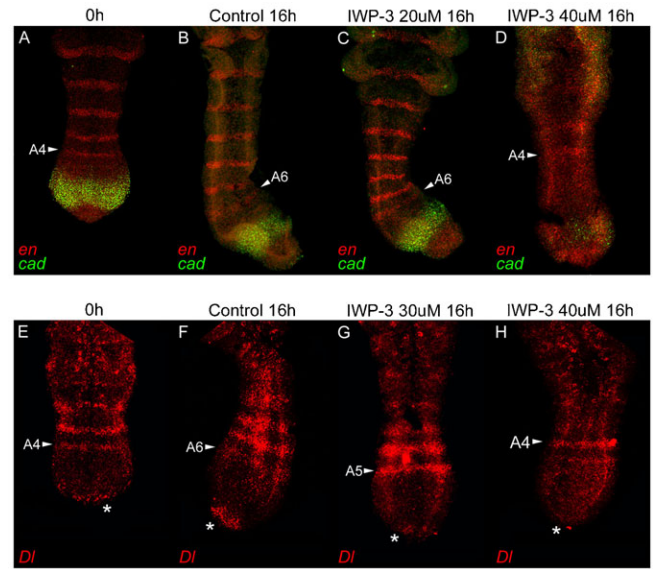

**Fig. S6. IWP-3 dosage effects on *Pa-en*, *Pa-cad* (A–D) and *Pa-Dl* expression patterns (E–H).** (A) *Pa-cad* (green) and *Pa-en* (red) patterns of expression in a stage 9 wild-type embryo prior culture. (B) A 16-hour DMSO control culture embryo labelled as in A. *Pa-en* is expressed segmentally up to the A6 segment and *Pa-cad* is expressed in the mid-GZ. (C) *Pa-en* and *Pa-cad* expressions have not been affected in a 16-hour 20  $\mu$ M IWP3 culture embryo. (D) In a 16-hour 40  $\mu$ M IWP3 culture embryo posterior *Pa-cad* expression is highly reduced and no newly *Pa-en* segmental stripes have been added. (E) Pattern of expression of *Pa-Dl* in the posterior tip (\*) and segmental stripes reaching the A3 segment in the anterior GZ in a stage 8 wild type embryo before culture. (F) In a 16-hour DMSO control culture embryo *Pa-Dl* is strongly expressed in the posterior tip (\*) and in segmental stripes reaching the A6 segment. (G) *Pa-Dl* expression in a 16-hour culture embryo with 30  $\mu$ M IWP3. *Pa-Dl* posterior tip (\*) domain is reduced and A5 *Pa-Dl* segmental stripe has been just laid down. (H) A 16-hour 40  $\mu$ M IWP3 culture embryo showing complete absence of *Pa-Dl* at the posterior tip and *Pa-Dl* segmental expression reaching the A4 segment.

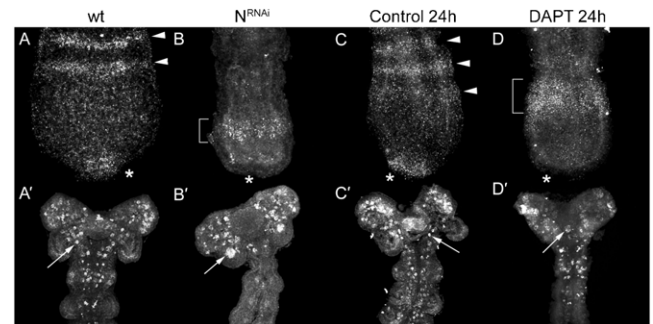

**Fig. S7. Notch signalling regulates *Pa-Dl* in the growth zone.** (A,A') Wild-type *Pa-Dl* expression in the posterior tip (\*, A) and segmental stripes in the anterior GZ (arrowheads, A), as well as in isolated neuroblasts in the developing head (arrow, A') and ventral trunk. (B,B') In *N*<sup>RNAi</sup> embryos, *Pa-Dl* expression reveals a loss of expression in the posterior tip (\*, B) and a single broad band of expression in the anterior GZ (bracket, B) resulting from a failure to form segmental stripes, along with a neuroblast phenotype revealed by clusters of neuroblast cells in the head and trunk (arrow, B'). (C,C') Similar to wild type, DMSO control cultured embryos express *Pa-Dl* in the posterior tip (\*, C), in several stripes in the anterior GZ (arrowheads, C), and in the developing neuroblasts (arrow, C'). (D,D') *Pa-Dl* expression in DAPT treated embryos is similar to that in *N*<sup>RNAi</sup> embryos; a broad band, but no stripes, of expression in the anterior GZ (bracket, D) and no expression in the posterior tip (\*, D) with large clusters of neuroblasts in the head and trunk (arrows, D'). These results confirm that Notch signalling regulates the stripes and cyclic expression of *Delta* in *Periplaneta*.
